# Supplementary material for: Likelihood Inference of Non-Constant Diversification Rates with Incomplete Taxon Sampling
Source: PubMed Central journal article supplement (PMC3882215; doi:10.1371/journal.pone.0084184), 2014-01-06
Supplement: pone.0084184.s001.pdf [file pone.0084184.s001.pdf]

# Likelihood Inference of non-constant Diversification Rates with Incomplete Taxon Sampling

**Running head:** Birth-Death Process with Incomplete Taxon Sampling

SEBASTIAN HÖHNA<sup>1,\*</sup>

<sup>1</sup> *Department of Mathematics, Stockholm University, Stockholm, Sweden*

*\* To whom correspondence should be addressed*

**Keywords:** Birth and death process, diversification, incomplete taxon sampling, Maximum Likelihood inference, Model assessment.

Sebastian Höhna  
Department of Mathematics  
Stockholm University  
Stockholm  
Sweden  
E-mail: Sebastian.Hoehna@gmail.com

# Derivation of the distribution function of a speciation time in the reconstructed tree

I will show that the derivative with respect to  $t$  of Equation (6) is identical to Equation (5):

$$\frac{d}{dt} \left( 1 - \frac{1 - P(N(T) > 0 | N(t) = 1) e^{r(t,T)}}{1 - P(N(T) > 0 | N(t_1) = 1) e^{r(t_1,T)}} \right) = \frac{\lambda(t) P(N(T) = 1 | N(t) = 1)}{1 - P(N(T) > 0 | N(t_1) = 1) e^{r(t_1,T)}}$$

The only factor depending on  $t$  is the second term in the denominator and the rest can be dropped

$$\begin{aligned} \frac{d}{dt} P(N(T) > 0 | N(t) = 1) e^{r(t,T)} &= \lambda(t) P(N(T) = 1 | N(t) = 1) \\ \frac{d}{dt} \frac{e^{r(t,T)}}{1 + \int_t^T \mu(s) e^{r(t,s)} ds} &= \frac{\lambda(t) e^{r(t,T)}}{(1 + \int_t^T \mu(s) e^{r(t,s)} ds)^2} \end{aligned}$$

I use the rule that the derivative of  $f(t)/g(t)$  equals  $(f'(t)g(t) - f(t)g'(t))/g^2(t)$  with  $f(t) = e^{r(t,T)}$ ,  $g(t) = 1 + \int_t^T \mu(s) e^{r(t,s)} ds$  and the derivatives

$$\begin{aligned} \frac{d}{dt} f(t) &= \frac{d}{dt} e^{r(t,T)} = \frac{d}{dt} e^{\int_t^T \mu(s) - \lambda(s) ds} = \frac{d}{dt} e^{-\int_t^T \mu(s) - \lambda(s) ds} \\ &= -(\mu(t) - \lambda(t)) e^{-\int_t^T \mu(s) - \lambda(s) ds} = -(\mu(t) - \lambda(t)) e^{r(t,T)} \end{aligned}$$

and using Leibniz integral rule

$\frac{d}{dt} \left( \int_{a(t)}^{b(t)} f(t, y) dy \right) = f(t, b(t)) b'(t) - f(t, a(t)) a'(t) + \int_{a(t)}^{b(t)} f_t(t, y) dy$  with  $a(t) = t$  and  $b(t) = T$ , thus

$$\begin{aligned} \frac{d}{dt} g(t) &= \frac{d}{dt} \left( 1 + \int_t^T \mu(s) e^{r(t,s)} ds \right) \\ &= 0 - \mu(t) e^{r(t,t)} - (\mu(t) - \lambda(t)) \int_t^T \mu(s) e^{r(t,s)} ds \\ &= -\mu(t) - (\mu(t) - \lambda(t)) \int_t^T \mu(s) e^{r(t,s)} ds \end{aligned}$$

Finally, by combining the partial result and simplifying the equation I finish the proof

$$\begin{aligned}
& \frac{d}{dt} \left( 1 - \frac{1 - P(N(T) > 0 | N(t) = 1) e^{r(t,T)}}{1 - P(N(T) > 0 | N(t_1) = 1) e^{r(t_1,T)}} \right) \\
&= \frac{1}{1 - P(N(T) > 0 | N(t_1) = 1) e^{r(t_1,T)}} \times \frac{d}{dt} \left( \frac{e^{r(t,T)}}{1 + \int_t^T \mu(s) e^{r(t,s)} ds} \right) \\
&= \frac{1}{1 - P(N(T) > 0 | N(t_1) = 1) e^{r(t_1,T)}} \\
&\times \frac{-(\mu(t) - \lambda(t) e^{r(t,T)}) (1 + \int_t^T \mu(s) e^{r(t,s)} ds) + (\mu(t) - \lambda(t)) \int_t^T \mu(s) e^{r(t,s)} ds + \mu(t) e^{r(t,T)}}{(1 + \int_t^T \mu(s) e^{r(t,s)} ds)^2} \\
&= \frac{1}{1 - P(N(T) > 0 | N(t_1) = 1) e^{r(t_1,T)}} \times \frac{\lambda(t) e^{r(t,T)}}{(1 + \int_t^T \mu(s) e^{r(t,s)} ds)^2} \\
&= \frac{\lambda(t) P(N(T) = 1 | N(t) = 1)}{1 - P(N(T) > 0 | N(t_1) = 1) e^{r(t_1,T)}} \quad \blacksquare
\end{aligned}$$

## Simulation study on the Maxim Likelihood

### Estimator

The aim of this simulation study is to identify the bias induced by the MLE on a constant rate pure birth model, a constant rate birth-death model and a decreasing speciation rate birth-death model. I simulated 1000 trees under complete taxon sampling for the time of the process  $T \in \{0.25, 0.5, \dots, 5\}$  and conditioning on survival of the process under (1) a constant rate pure birth process ( $\lambda = 1.0$ ) (2) a constant rate birth-death process ( $\lambda = 1.6, \mu = 0.8$ ) and (3) a birth-death process with a decreasing speciation rate ( $\lambda(t) = 1 + 4 * \exp(-1 * t), \mu = 1$ ). Then, I estimated the model parameters  $\lambda, \mu$  and  $\alpha$  for each tree choosing the true model. Here I present the results for the constant rate pure birth model and the constant rate birth-death model. The results of the birth-death model with a decreasing speciation rate was present in the

main text.

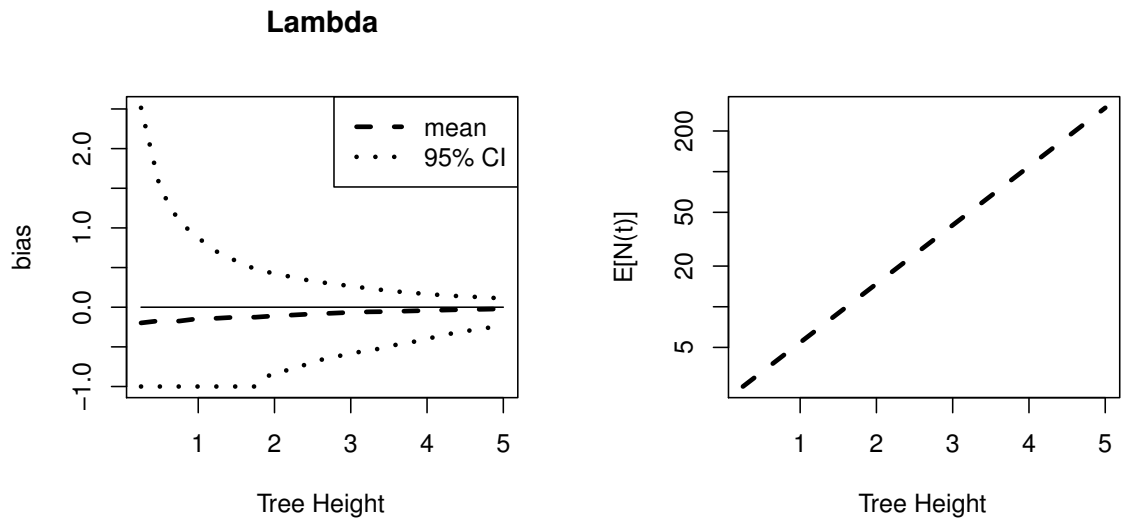

Figure S.1: The bias in the maximum likelihood estimates of parameters defining the speciation and extinction rate. The true parameters was  $\lambda = 4$  and  $\mu = 0$ . The figure shows that the bias decreases with larger trees (by simulating trees with a larger time  $t$ ). The expected number of species ( $E[N(t)]$ ) is presented to illustrate the increase in diversity over time.

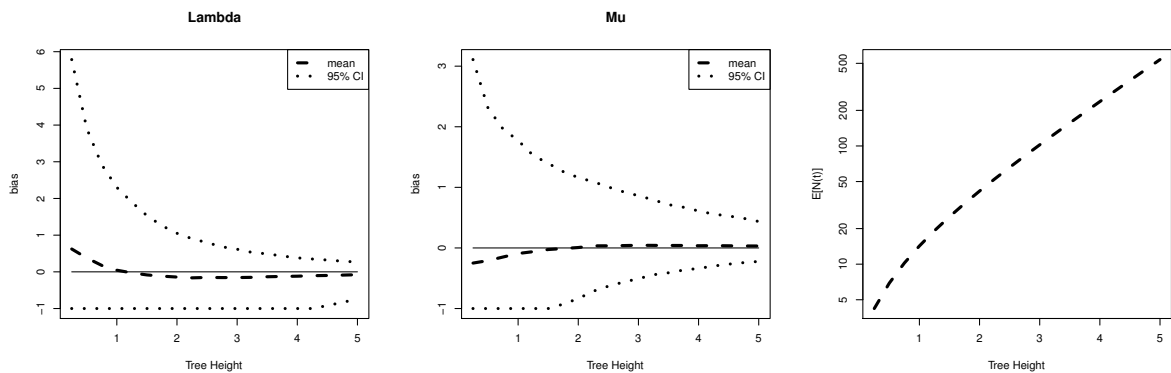

Figure S.2: The bias in the maximum likelihood estimates of parameters defining the speciation and extinction rate. The true parameters were  $\lambda = 4$  and  $\mu = 3.2$ . The figure shows that the bias decreases with larger trees (by simulating trees with a larger time  $t$ ). The expected number of species ( $E[N(t)]$ ) is presented to illustrate the increase in diversity over time.

## Simulation study on the Efficacy of the BIC

In the main text I discussed the efficacy of the Akaike's Information Criterion corrected for finite samples (AICc) to select the best model. Here, I repeat the simulation study but using the Bayesian Information Criterion (BIC) instead of the AICc. The simulation study design is as follows: I simulated 100 trees with  $n = 100$  taxa under (1) a constant rate pure birth process, (2) a decreasing rate pure birth process and (3) a constant rate birth-death process with  $\rho \in \{0.05, 0.15, \dots, 0.95\}$  once under uniform taxon sampling and once under diversified taxon sampling. For each tree the best model out of the six mentioned models in Table 1 was selected. For the constant rate pure birth process I choose the rate  $\lambda = 1.0$ ; for the decreasing rate pure birth process I choose the rate function  $\lambda(t) = 4.0 * \exp(-0.5 * t)$  and for the constant rate birth-death process I choose the rates  $\lambda = 1.0$  and  $\mu = 0.75$ .

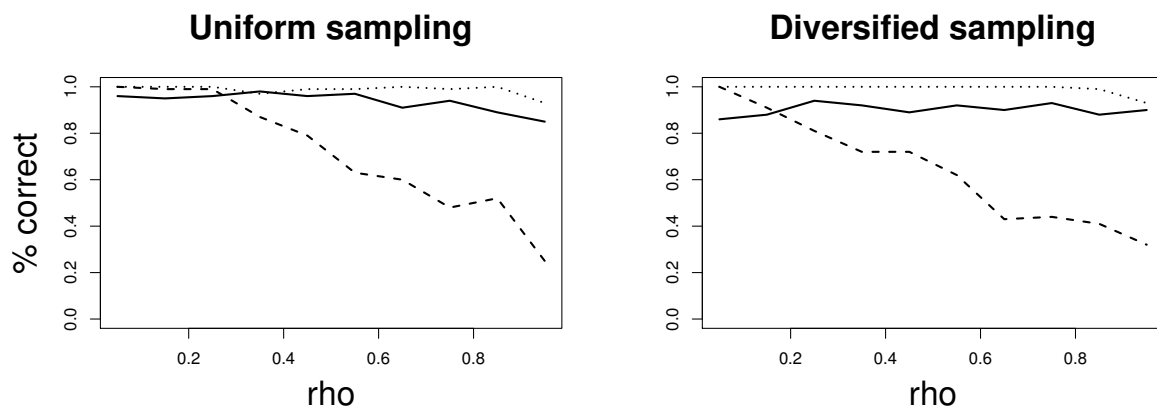

Figure S.3: Sensitivity analysis of the Bayesian Information Criterion to select the correct model. Trees were simulated under three different models: constant rate pure birth (solid line), decreasing rate pure birth (dashed line) and constant rate birth-death (dotted line). The x-axis shows simulations for different sampling probabilities  $\rho$ .

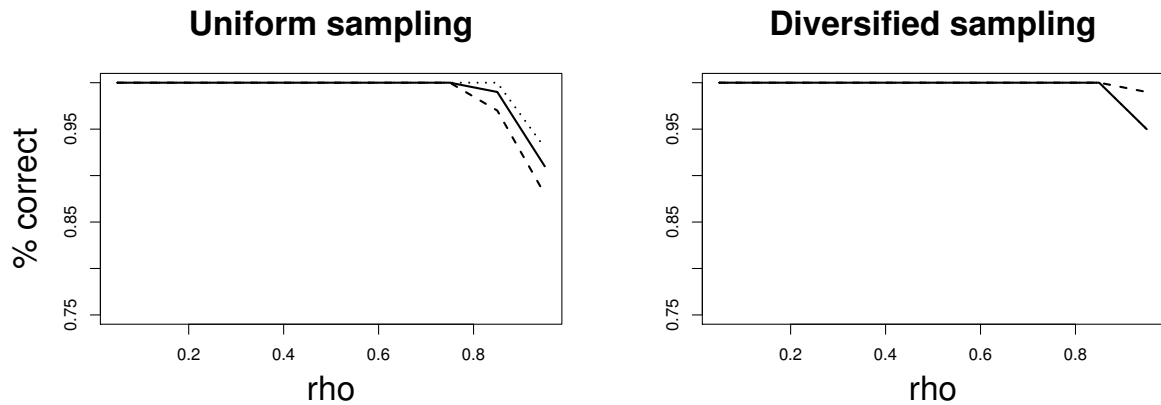

Figure S.4: The sensitivity analysis testing whether the sampling strategy can be inferred. Trees were simulated under three different models: constant rate pure birth (solid line), decreasing rate pure birth (dashed line) and constant rate birth-death (dotted line). The x-axis shows simulations for different sampling probabilities  $\rho$ .

## Empirical results on the empirical phylogenies

I estimated the MLE for the six different models under uniform sampling and diversified sampling on three empirical datasets: ants [1], mammals [2] and snakes [3]. Here I present the results of the analyses including the model adequacy tests. The MLEs were obtained in R using the function *optim*, see also the R scripts deposited in the Dryad data repository at [doi.org/10.5061/dryad.rd2s3](https://doi.org/10.5061/dryad.rd2s3). The model adequacy tests were performed using a parametric bootstrap by simulating 10000 trees under the MLE parameters and computing the number of taxa, the  $\gamma$ -statistic and the time of the process to reach  $n$  taxa.

Table S.1: Data set *Ants*

| Model | log-Likelihood | AICc            | BIC             | p-value(gamma) | p-value(taxa) | p-value(treeheight) |
|-------|----------------|-----------------|-----------------|----------------|---------------|---------------------|
| 1     | -621.7704      | 1245.571        | 1248.454        | 0.746          | 0.115         | 0.533               |
| 2     | -619.1779      | <b>1242.446</b> | <b>1248.181</b> | 0.991          | 0.006         | 1                   |
| 3     | -621.7704      | 1247.631        | 1253.366        | 0.738          | 0.142         | 0.538               |
| 4     | -619.1779      | 1244.538        | 1253.094        | 0.991          | 0.006         | 1                   |
| 5     | -619.1779      | 1244.538        | 1253.094        | 0.992          | 0.006         | 1                   |
| 6     | -619.1779      | 1246.661        | 1258.006        | 0.99           | 0.005         | 1                   |
| 7     | -829.4413      | 1660.912        | 1663.795        | 0.01           | 0             | 0.999               |
| 8     | -829.4413      | 1662.973        | 1668.708        | 1              | 0             | 1                   |
| 9     | -637.0724      | 1278.235        | 1283.97         | 0              | 0             | 1                   |
| 10    | -829.4413      | 1665.064        | 1673.621        | 1              | 0             | 1                   |
| 11    | -638.3722      | 1282.926        | 1291.482        | 0.751          | 0.128         | 0                   |
| 12    | -626.0846      | 1260.475        | 1271.82         | 1              | 0             | 1                   |

Table S.2: Data set *Mammals*

| Model | log-Likelihood | AICc            | BIC             | p-value(gamma) | p-value(taxa) | p-value(treeheight) |
|-------|----------------|-----------------|-----------------|----------------|---------------|---------------------|
| 1     | -642.524       | 1287.077        | 1289.982        | 1              | 0             | 1                   |
| 2     | -642.524       | 1289.136        | 1294.917        | 1              | 0             | 1                   |
| 3     | -640.0346      | <b>1284.157</b> | <b>1289.938</b> | 1              | 0             | 1                   |
| 4     | -642.524       | 1291.226        | 1299.851        | 1              | 0             | 1                   |
| 5     | -640.0346      | 1286.247        | 1294.873        | 1              | 0             | 1                   |
| 6     | -640.0346      | 1288.368        | 1299.807        | 1              | 0             | 1                   |
| 7     | -1367.745      | 2737.52         | 2740.425        | 0              | 0             | 1                   |
| 8     | -1367.745      | 2739.579        | 2745.36         | 1              | 0             | 1                   |
| 9     | -686.1957      | 1376.48         | 1382.26         | 0              | 0             | 1                   |
| 10    | -1367.745      | 2741.668        | 2750.294        | 1              | 0             | 1                   |
| 11    | -687.4036      | 1380.985        | 1389.611        | 0.46           | 0.024         | 0.009               |
| 12    | -1202.169      | 2412.637        | 2424.076        | 1              | 0             | 1                   |

Table S.3: Data set *Snakes*

| Model | log-Likelihood | AICc            | BIC             | p-value(gamma) | p-value(taxa) | p-value(treeheight) |
|-------|----------------|-----------------|-----------------|----------------|---------------|---------------------|
| 1     | -202.6015      | 407.3056        | 408.9166        | 0.999          | 0.001         | 0.956               |
| 2     | -202.6015      | 409.5188        | 412.6302        | 0.999          | 0.001         | 1                   |
| 3     | -196.4687      | 397.2532        | 400.3646        | 1              | 0             | 1                   |
| 4     | -202.6015      | 411.8517        | 416.3437        | 0.999          | 0.001         | 1                   |
| 5     | -196.4687      | 399.5861        | 404.0782        | 0.872          | 0.072         | 1                   |
| 6     | -196.4687      | 402.0486        | 407.7917        | 1              | 0             | 1                   |
| 7     | -306.2222      | 614.547         | 616.158         | 0              | 0             | 1                   |
| 8     | -306.2222      | 616.7602        | 619.8716        | 1              | 0             | 1                   |
| 9     | -187.8457      | <b>380.0072</b> | <b>383.1186</b> | 0              | 0             | 1                   |
| 10    | -306.2222      | 619.0931        | 623.5852        | 1              | 0             | 1                   |
| 11    | -190.0627      | 386.7741        | 391.2661        | 0.995          | 0.006         | 0.015               |
| 12    | -187.357       | 383.8251        | 389.5683        | 1              | 0             | 1                   |

## References

- [1] Moreau CS, Bell CD, Vila R, Archibald SB, Pierce NE (2006) Phylogeny of the ants: diversification in the age of angiosperms. *Science* 312: 101–104.
  
- [2] Meredith R, Janečka J, Gatesy J, Ryder O, Fisher C, et al. (2011) Impacts of the Cretaceous Terrestrial Revolution and KPg extinction on mammal diversification. *Science* 334: 521–524.
  
- [3] Pyron RA, Burbrink FT (2012) Extinction, ecological opportunity, and the origins of global snake diversity. *Evolution* 66: 163–178.
